# Supplementary material for: Transcriptome Analysis for Salt-Responsive Genes in Two Different Alfalfa (Medicago sativa L.) Cultivars and Functional Analysis of MsHPCA1
Source: MDPI journal article supplement (doi:10.3390/plants13081073), 2024-04-11
Supplement: s1 [file s1]

Table S1 Summary of read numbers based on the RNA-Seq data from two varieties alfalfa seedling.

|                      | Sibeied    |            |            | Gongnong NO.1 |            |            |
|----------------------|------------|------------|------------|---------------|------------|------------|
|                      | 0h         | 12h        | 24h        | 0h            | 12h        | 24h        |
| Total reads          | 23,193,268 | 22,249,331 | 23,136,572 | 23,360,050    | 23,152,698 | 21,849,447 |
| Mapped reads         | 18,570,963 | 17,811,746 | 18,528,072 | 18,603,816    | 18,809,403 | 17,791,533 |
| Unique match         | 17,348,603 | 16,556,222 | 17,238,635 | 17,335,489    | 17,550,090 | 16,555,858 |
| Multi-position match | 1,222,360  | 1,255,524  | 1,289,437  | 1,268,327     | 1,259,313  | 1,235,675  |
| Unmapped reads       | 4,622,305  | 4,437,585  | 4,608,500  | 4,756,234     | 4,343,295  | 4,057,914  |

Table S2 DEGs involved in 'Gongnong No.1' at 12h and 24h after salt tolerant.

| Gene ID                    | Expression | Levels | Description                 |
|----------------------------|------------|--------|-----------------------------|
|                            | G12h       | G24h   |                             |
| Glycometabolism-associated |            |        |                             |
| MsG0680031838              | 6.72       | 5.27   | UDP-glucosyltransferase     |
| MsG0780038334              | 3.81       | 3.99   | UDP-glucosyltransferase     |
| MsG0580028342              | 3.81       | 3.23   | UDP-glucosyltransferase     |
| MsG0880047496              | 2.84       | 2.53   | UDP-glucosyltransferase     |
| MsG0480020934              | 2.64       | 2.73   | UDP-glucosyltransferase     |
| MsG0780038123              | 2.58       | 3.04   | UDP-glucosyltransferase     |
| MsG0880045104              | 2.48       | 2.00   | UDP-glucosyltransferase     |
| MsG0380015885              | 2.18       | 2.34   | UDP-glucosyltransferase     |
| MsG0880042173              | 2.09       | 1.12   | UDP-glucosyltransferase     |
| MsG0280011136              | 2.03       | 1.52   | UDP-glucosyltransferase     |
| MsG0780039877              | 1.89       | 1.69   | UDP-glucosyltransferase     |
| MsG0480023272              | 1.86       | 2.69   | UDP-glucosyltransferase     |
| MsG0680035715              | 1.77       | 1.57   | UDP-glucosyltransferase     |
| MsG0480018495              | 1.76       | 1.38   | UDP-glucosyltransferase     |
| MsG0380017787              | 1.75       | 2.13   | UDP-glucosyltransferase     |
| MsG0880045105              | 1.71       | 2.55   | SWEET sugar transporter     |
| MsG0880046908              | 1.71       | 1.58   | Sugar/inositol transporter  |
| MsG0380013908              | 1.63       | 1.52   | Sugar phosphate transporter |
| MsG0480021781              | 1.60       | 1.29   | Sugar phosphate transporter |
| MsG0180005764              | 1.56       | 2.08   | Sugar transporter-like      |
| MsG0680035710              | 1.57       | 1.10   | Sucrose synthase            |
| MsG0180001050              | 1.39       | 1.31   | Glyoxalase-like             |
| MsG0780039739              | 1.35       | 1.44   | Glycosyl transferase 8      |
| MsG0680030659              | 1.33       | 1.27   | Glycosyl transferase 14     |
| MsG0780038116              | 1.31       | 1.78   | Glycosyl hydrolases 36      |
| MsG0880046325              | 1.27       | 1.32   | Glycoside hydrolase 5       |
| MsG0280009291              | 1.23       | 1.49   | Glycoside hydrolase 3       |
| MsG0580027360              | 1.23       | 1.21   | Glycoside hydrolase 28      |
| MsG0380011504              | 1.16       | 1.14   | Glycoside hydrolase 28      |
| MsG0380016061              | 1.15       | 1.06   | Glycoside hydrolase 28      |
| MsG0780038117              | 1.14       | 1.75   | Glycoside hydrolase 28      |
| MsG0280007901              | 1.13       | 1.57   | Glycoside hydrolase 27      |
| MsG0280009307              | 1.07       | 1.38   | Glycoside hydrolase 19      |

|                                 |       |       |                                                 |
|---------------------------------|-------|-------|-------------------------------------------------|
| MsG0880043127                   | 1.02  | 1.26  | Glycoside hydrolase 19                          |
| MsG0280008645                   | -1.08 | -1.08 | Glycoside hydrolase 18                          |
| MsG0580030055                   | -1.10 | -1.04 | Glycoside hydrolase 17                          |
| MsG0480022515                   | -1.25 | -1.11 | Glycoside hydrolase 16                          |
| MsG0380015190                   | -1.34 | -1.36 | Glycoside hydrolase 1                           |
| MsG0180004351                   | -2.33 | -1.98 | Cellulose synthase                              |
| MsG0780040306                   | -3.67 | -3.39 | Galactose-binding-like                          |
| Energy-associated               |       |       |                                                 |
| MsG0180005882                   | 7.14  | 5.92  | ATPase, F1/V1/A1 complex                        |
| MsG0180000608                   | 1.58  | 2.14  | ATPase, AFG1-like                               |
| MsG0380016836                   | 1.16  | 1.39  | AAA+ ATPase                                     |
| MsG0880045924                   | 2.44  | 2.59  | P-type ATPase                                   |
| MsG0580025389                   | 1.24  | 1.19  | AMP-dependent synthetase                        |
| MsG0680031843                   | -1.30 | -1.31 | AAA+ ATPase                                     |
| MsG0580025521                   | -1.10 | -2.20 | Small GTPase                                    |
| MsG0780038417                   | 3.18  | 3.79  | NAD(P)-binding                                  |
| MsG0580024178                   | 2.04  | 1.97  | NADH/Aldolase-type TIM barrel                   |
| MsG0780041642                   | 1.25  | 1.42  | NADP-dependent oxidoreductase                   |
| MsG0780036964                   | 1.74  | 1.15  | FMN-binding split barrel                        |
| MsG0480020444                   | 1.39  | 1.77  | FAD/NAD(P)-binding                              |
| MsG0380011901                   | 4.73  | 4.23  | Oxygen oxidoreductase covalent FAD-binding site |
| MsG0280007749                   | 1.09  | 1.47  | FAD linked oxidase                              |
| MsG0880042930                   | -1.70 | -2.11 | FAD linked oxidase                              |
| MsG0480022692                   | 4.56  | 6.15  | Mitochondrial substrate                         |
| MsG0280011053                   | 1.50  | 1.50  | Mitochondrial substrate                         |
| MsG0480018326                   | -1.10 | -1.41 | Mitochondrial substrate                         |
| Transcription factor-associated |       |       |                                                 |
| MsG0280010800                   | 6.85  | 6.40  | Zinc finger, RING-type                          |
| MsG0180004800                   | 3.09  | 3.04  | Zinc finger, RING-CH-type                       |
| MsG0480020428                   | 2.75  | 1.53  | Zinc finger, RING-type                          |
| MsG0780039229                   | 1.55  | 1.20  | Zinc finger, RING-type                          |
| MsG0880046674                   | -1.25 | -1.31 | Zinc finger, RING-type                          |
| MsG0480023441                   | -2.67 | -2.34 | Zinc finger, RING-type                          |
| MsG0180003673                   | -3.73 | -4.30 | Zinc finger, RING-type                          |
| MsG0380012512                   | 2.52  | 2.72  | Zinc finger, CCHC-type                          |
| MsG0880045175                   | -1.17 | -1.10 | Zinc finger, CCHC-type                          |
| MsG0880046752                   | 1.04  | 1.57  | Zinc finger, CCCH-type                          |
| MsG0380017253                   | -1.43 | -1.33 | Zinc finger, CCCH-type                          |

|                   |       |       |                                        |
|-------------------|-------|-------|----------------------------------------|
| MsG0080048430     | -1.48 | -1.27 | Zinc knuckle CX2CX4HX4C                |
| MsG0880042051     | 6.86  | 6.44  | AP2/ERF                                |
| MsG0580024424     | 6.21  | 5.27  | AP2/ERF                                |
| MsG0380017423     | 3.58  | 2.90  | AP2/ERF                                |
| MsG0180005095     | -1.53 | -1.15 | AP2/ERF                                |
| MsG0780041742     | 3.02  | 2.23  | WRKY                                   |
| MsG0280011473     | 1.49  | 1.33  | WRKY                                   |
| MsG0380013522     | 2.75  | 2.24  | SANT/Myb                               |
| MsG0780040741     | 2.47  | 2.41  | SANT/Myb                               |
| MsG0280010653     | 2.30  | 1.87  | SANT/Myb                               |
| MsG0480020725     | 1.81  | 2.58  | SANT/Myb                               |
| MsG0380015227     | 1.30  | 1.24  | SANT/Myb                               |
| MsG0180004180     | -1.12 | -1.59 | SANT/Myb                               |
| MsG0280011041     | 1.29  | 1.53  | GRAS                                   |
| MsG0480023497     | 1.25  | 1.50  | NAC                                    |
| MsG0280009717     | 1.00  | 1.17  | NAC                                    |
| MsG0180001854     | -2.38 | -1.37 | NAC                                    |
| MsG0180005527     | 1.17  | 1.17  | bHLH                                   |
| MsG0580025575     | 1.06  | 1.42  | bHLH                                   |
| MsG0280010124     | -1.14 | -1.30 | TCP                                    |
| Stress-associated |       |       |                                        |
| MsG0780040578     | 7.41  | 7.36  | Late embryogenesis abundant protein 25 |
| MsG0580028758     | 2.21  | 1.74  | Late embryogenesis abundant protein 14 |
| MsG0580027808     | 2.10  | 1.88  | Late embryogenesis abundant protein14  |
| MsG0580028668     | 1.89  | 2.08  | Late embryogenesis abundant protein14  |
| MsG0180000472     | 5.99  | 5.71  | Hsp20-like                             |
| MsG0480022345     | 3.69  | 4.27  | Hsp20                                  |
| MsG0480022532     | 3.67  | 4.59  | Hsp20                                  |
| MsG0480022344     | 3.15  | 4.50  | Hsp20                                  |
| MsG0280008285     | 1.78  | 1.41  | Hsp70                                  |
| MsG0880045617     | 1.44  | 1.80  | Hsp90-like                             |
| MsG0680031459     | 5.24  | 3.07  | EF-hand                                |
| MsG0880046234     | 4.26  | 3.17  | EF-hand                                |
| MsG0180000257     | 2.66  | 3.37  | EF-hand                                |
| MsG0880047171     | 1.41  | 1.21  | EF-hand                                |
| MsG0380017134     | 1.72  | 1.81  | EF-hand                                |
| MsG0780038940     | 3.36  | 2.49  | Glutathione S-transferase              |
| MsG0180004947     | 2.51  | 2.18  | Glutathione S-transferase              |

|               |      |      |                                            |
|---------------|------|------|--------------------------------------------|
| MsG0780038939 | 2.34 | 2.09 | Glutathione S-transferase                  |
| MsG0280009765 | 2.18 | 2.45 | Glutathione S-transferase                  |
| MsG0680030336 | 2.18 | 1.76 | Thioredoxin-like ferredoxin                |
| MsG0180004941 | 2.00 | 2.02 | Glutathione S-transferase                  |
| MsG0180004879 | 1.82 | 1.64 | Glutathione S-transferase                  |
| MsG0380012122 | 1.61 | 1.61 | Thioredoxin                                |
| MsG0580026027 | 1.41 | 1.97 | Thioredoxin                                |
| MsG0380011844 | 1.35 | 1.07 | Thioredoxin                                |
| MsG0180004880 | 1.34 | 1.63 | Glutathione S-transferase                  |
| MsG0780039805 | 1.18 | 1.28 | Glutaredoxin                               |
| MsG0180004942 | 1.07 | 1.29 | Glutathione S-transferase                  |
| MsG0180004895 | 1.08 | 1.34 | Glutaredoxin                               |
| MsG0580027201 | 2.25 | 2.71 | Plant peroxidase                           |
| MsG0380016748 | 2.23 | 1.51 | Plant peroxidase                           |
| MsG0880045686 | 1.70 | 1.50 | Plant peroxidase                           |
| MsG0880045955 | 1.39 | 1.16 | Plant peroxidase                           |
| MsG0880045973 | 1.37 | 1.35 | Plant peroxidase                           |
| MsG0280007687 | 1.22 | 1.45 | Plant peroxidase                           |
| MsG0580029291 | 1.03 | 1.60 | Plant peroxidase                           |
| MsG0480018530 | 1.70 | 1.74 | Toll/interleukin-1 receptor homology (TIR) |
| MsG0880044837 | 1.62 | 1.38 | Toll/interleukin-1 receptor homology (TIR) |
| MsG0480022752 | 1.33 | 1.22 | Stress up-regulated Nod 19                 |
| MsG0380015868 | 1.05 | 1.13 | Manganese/iron superoxide dismutase        |

---

Table S3 DEGs involved in 'Sibeide' at 12h and 24h after salt-tolerant.

| Gene ID                     | Expression | Levels | Description                                    |
|-----------------------------|------------|--------|------------------------------------------------|
|                             | S12h       | S24h   |                                                |
| Glyco-metabolism-associated |            |        |                                                |
| MsG0780039323               | 3.00       | 3.37   | UDP-glucosyltransferase                        |
| MsG0880041992               | -1.28      | -1.58  | UDP-glycosyltransferase                        |
| MsG0180005810               | -1.42      | -1.25  | UDP-glycosyltransferase                        |
| MsG0680030477               | 1.38       | 1.48   | SWEET sugar transporter                        |
| MsG0680030470               | 1.30       | 1.57   | SWEET sugar transporter                        |
| MsG0280010202               | -1.68      | -1.85  | Sugar phosphate transporter                    |
| MsG0680030621               | -1.74      | -1.10  | Glycosyl transferase 2-like                    |
| MsG0280008254               | 1.53       | 1.04   | Glycosyl transferase 14                        |
| MsG0780040702               | 1.03       | 1.71   | Glycosyl transferase 8                         |
| MsG0580025982               | -1.10      | -1.05  | Glycosyl transferase 92                        |
| MsG0580027605               | 2.05       | 1.41   | Glycoside hydrolase                            |
| MsG0480022184               | 1.85       | 1.92   | Glycoside hydrolase                            |
| MsG0180004349               | 1.67       | 1.42   | Glycoside hydrolase 27/36                      |
| MsG0880047761               | 1.65       | 1.48   | Glycoside hydrolase 17                         |
| MsG0880047207               | 1.39       | 1.09   | Glycoside hydrolase 1                          |
| MsG0480021114               | 1.20       | 1.26   | Glycoside hydrolase 1                          |
| MsG0180000436               | -1.07      | -1.55  | Glycoside hydrolase 32                         |
| MsG0180000437               | -1.39      | -1.57  | Glycoside hydrolase 32                         |
| MsG0480021131               | -1.66      | -2.08  | Glycoside hydrolase 1                          |
| MsG0880041896               | -1.36      | -1.77  | Malate dehydrogenase, type 2                   |
| MsG0680034483               | 1.38       | 1.52   | Fructose-bisphosphate aldolas                  |
| MsG0780041081               | 1.37       | 1.58   | Fructose-bisphosphate aldolase                 |
| MsG0480021327               | 1.37       | 2.37   | Fructose-bisphosphate aldolase                 |
| MsG0780041082               | 1.17       | 1.38   | Fructose-bisphosphate aldolase                 |
| MsG0080048965               | 2.83       | 2.52   | Trehalose-phosphatase                          |
| MsG0180000567               | -1.23      | -1.36  | Chitinase II                                   |
| MsG0680030406               | -1.59      | -1.18  | Pectin lyase                                   |
| Energy-associated           |            |        |                                                |
| MsG0780036265               | 2.27       | 2.38   | AAA+ ATPase                                    |
| MsG0380013942               | 1.63       | 1.86   | ATPase, F1/V1/A1 complex                       |
| MsG0380017406               | 1.40       | 1.57   | ATP synthase, F0 complex, subunit              |
| MsG0880046219               | 1.12       | 1.26   | ATP synthase OSCP                              |
| MsG0780041367               | 1.00       | 1.20   | ATP-dependent Clp protease proteolytic subunit |
| MsG0380015758               | -1.02      | -1.09  | ATPase, AAA-type                               |
| MsG0880042935               | -1.11      | -1.18  | Putative ATP-synthase-associated protein       |
| MsG0380016571               | -1.15      | -1.47  | ATPase, AAA-type                               |

|                                 |       |       |                                          |
|---------------------------------|-------|-------|------------------------------------------|
| MsG0180003504                   | -1.59 | -1.24 | AMP-dependent synthetase enzyme          |
| MsG0780041383                   | -2.26 | -1.42 | AMP-dependent synthetase                 |
| MsG0780039304                   | 6.42  | 4.73  | NADP-dependent oxidoreductase            |
| MsG0380017196                   | 1.15  | 1.51  | NAD(P)-binding                           |
| MsG0280007079                   | 1.15  | 1.00  | NAD(P)-binding                           |
| MsG0180003730                   | -1.17 | -1.00 | NAD(P)-binding                           |
| MsG0580025511                   | -1.24 | -1.30 | NAD(P)-binding                           |
| MsG0680030421                   | -1.60 | -1.96 | NAD(P)-binding                           |
| MsG0780039576                   | -1.78 | -1.44 | NAD-dependent epimerase/dehydratase      |
| MsG0580024990                   | -1.80 | -1.06 | NAD(P)-binding                           |
| MsG0480020487                   | -1.86 | -1.15 | NAD(P)-binding                           |
| MsG0580030133                   | -2.00 | -1.23 | NADP-dependent oxidoreductase            |
| MsG0580030135                   | -2.09 | -1.23 | NADP-dependent oxidoreductase            |
| MsG0480021361                   | -2.67 | -2.77 | NADP-dependent oxidoreductase            |
| MsG0280011016                   | -3.91 | -3.29 | NAD-dependent epimerase/dehydratase      |
| MsG0180002255                   | -1.33 | -1.10 | NADPH-dependent FMN reductase-like       |
| MsG0880044675                   | -2.62 | -2.41 | NADPH-dependent FMN reductase-like       |
| MsG0880044676                   | -3.06 | -2.22 | NADPH-dependent FMN reductase-like       |
| MsG0480018405                   | 1.04  | 1.07  | Cryptochrome/DNA photolyase, FAD-binding |
| MsG0880043920                   | -1.38 | -1.19 | Oxidoreductase FAD/NAD(P)-binding        |
| MsG0880046296                   | -1.64 | -1.78 | FAD-binding 8                            |
| Transcription factor-associated |       |       |                                          |
| MsG0580028462                   | 1.82  | 1.55  | Zinc finger, RING-type                   |
| MsG0180003687                   | -1.10 | -1.63 | Zinc finger, RING-type                   |
| MsG0880046215                   | -1.15 | -1.99 | Zinc finger, RING-type                   |
| MsG0480023693                   | -1.21 | -1.16 | Zinc finger, RING-type                   |
| MsG0080047905                   | -1.24 | -1.22 | Zinc finger, RING-type                   |
| MsG0180003595                   | -1.28 | -1.27 | Zinc finger, RING-type                   |
| MsG0880043098                   | -1.32 | -1.40 | Zinc finger, RING-type                   |
| MsG0580028016                   | -1.21 | -1.02 | Zinc finger, CCCH-type                   |
| MsG0580026614                   | -1.31 | -1.05 | Zinc finger, CCHC-type                   |
| MsG0580026192                   | -2.98 | -3.58 | Zinc finger, Dof-type                    |
| MsG0380015805                   | -1.14 | -1.54 | Zinc finger, Dof-type                    |
| MsG0580029912                   | 1.37  | 1.93  | zinc ribbon                              |
| MsG0780041106                   | 1.29  | 1.40  | Zinc finger, AN1-type                    |
| MsG0580027325                   | 1.04  | 1.04  | Basic-leucine zipper                     |
| MsG0280010515                   | -1.02 | -1.06 | Basic-leucine zipper                     |
| MsG0480023067                   | -1.43 | -1.50 | Basic-leucine zipper                     |
| MsG0880046457                   | -1.13 | -1.25 | ZF-HD homeobox                           |
| MsG0180003830                   | -2.03 | -1.75 | AP2/ERF                                  |
| MsG0580029966                   | 1.72  | 1.59  | CBF                                      |

|                   |       |       |                                     |
|-------------------|-------|-------|-------------------------------------|
| MsG0380016957     | 1.33  | 1.33  | CBF                                 |
| MsG0280008749     | 3.64  | 3.77  | MADS-box                            |
| MsG0180000525     | 2.42  | 2.17  | WRKY                                |
| MsG0280007786     | -1.51 | -2.43 | WRKY                                |
| MsG0080048036     | -1.68 | -2.19 | WRKY                                |
| MsG0380014706     | -1.13 | -1.89 | SANT/Myb                            |
| MsG0580024732     | -3.93 | -4.68 | SANT/Myb                            |
| MsG0280011042     | -1.26 | -1.75 | GRAS                                |
| MsG0680032758     | -1.05 | -1.08 | GRAS                                |
| MsG0580024328     | -1.41 | -1.55 | GRAS                                |
| MsG0580025534     | -1.10 | -1.32 | bHLH                                |
| MsG0880043481     | -2.03 | -1.80 | bHLH                                |
| MsG0480022288     | -2.30 | -1.66 | bHLH                                |
| MsG0280010611     | -1.38 | -1.34 | Homeobox                            |
| MsG0480019666     | -1.73 | -1.11 | K-box                               |
| Stress-associated |       |       |                                     |
| MsG0180000047     | 1.32  | 1.40  | Hsp90                               |
| MsG0380015992     | 1.20  | 1.47  | Hsp70                               |
| MsG0280006520     | 1.00  | 1.26  | Hsp70                               |
| MsG0780040480     | -1.03 | -1.34 | Hsp90-type                          |
| MsG0480022400     | -2.29 | -2.58 | Hsp-type                            |
| MsG0780038722     | 1.63  | 1.14  | EF-hand                             |
| MsG0880043002     | -1.09 | -1.10 | EF-hand                             |
| MsG0280011105     | -1.09 | -1.75 | EF-hand                             |
| MsG0880043460     | -1.39 | -1.82 | EF-hand                             |
| MsG0880047006     | 2.17  | 2.40  | Glutaredoxin                        |
| MsG0880045094     | 1.47  | 1.11  | Thioredoxin-like                    |
| MsG0580026148     | -1.50 | -1.30 | Glutathione S-transferase           |
| MsG0680030740     | -1.92 | -1.72 | Glutaredoxin                        |
| MsG0580025023     | -1.20 | -1.10 | Plant peroxidase                    |
| MsG0780039390     | 2.10  | 2.33  | Vitamin C permease                  |
| MsG0380016734     | 1.03  | 1.29  | Manganese/iron superoxide dismutase |

---

Table S4 Primer sequence associated with this article experiments.

| Gene                     | Forward primer/ Reverse primer (5'-3')                   | Amplicon length (bp) |
|--------------------------|----------------------------------------------------------|----------------------|
| MsHPCA1-ORF-F            | ATGGGTGAAAGAACTCTAGTGTTCTACTCTTCCTTTTCAG                 | 2865                 |
| MsHPCA1-ORF-R            | TTATGCACGCGGAAGTATCACACTTGAATCAAAGTACTC                  |                      |
| MsHPCA1-pENTER-tasiRNA-F | GGAATTCAAGAACTGGAACATTCTGGAATACCTTGCACTTTCAACTTTAAAG     | 300                  |
| MsHPCA1-pENTER-tasiRNA-R | CGGGATCCACCAGTGAAACCACAATTAATAAG                         |                      |
| MsHPCA1-pQB-V3-F         | CTTTGTACAAAAAAGCAGGCTCAGGGGATGATATCATGGGTGAAAGAACTCTAGTG | 2856                 |
| MsHPCA1-pQB-V3-R         | TTGTACAAGAAAGCTGGGTGCAGGGCGATGATATCTGCACGCGGAAGTATC      |                      |
| MsHPCA1-pENTER-OE-F      | GTCGACGGTATCGATAAGCTTATGGGTGAAAGAACTCTAGTG               | 2856                 |
| MsHPCA1-pENTER-OE-R      | CCAAATGTTTGAACGTCTAGATGCACGCGGAAGTATC                    |                      |
| MsHPCA1-qpcr-F           | ATGATTCAGTAATAGAAGGTCCTGT                                | 198                  |
| MsHPCA1-qpcr-R           | TGCTCTCATCAGGACCCCA                                      |                      |
| MsActin-qpcr-F           | GCTGACCGTATGAGCAAGGA                                     | 114                  |
| MsActin-qpcr-R           | TGCCAAGATAGACCCACCAA                                     |                      |
